# Fantastic beasts and how to sequence them: genomic approaches for obscure model organisms

Mikhail V. Matz

Department of Integrative Biology, University of Texas at Austin, Austin, TX 78712, USA  
[matz@utexas.edu](mailto:matz@utexas.edu)

## *Summary:*

Application of genomic approaches to “obscure model organisms” (OMOs), meaning species with little or no genomic resources, enables increasingly sophisticated studies of genomic basis of evolution, acclimatization and adaptation in real ecological contexts. Here, I highlight sequencing solutions and data handling techniques most suited for genomic analysis of OMOs.

---

## *Glossary:*

- **Allele Frequency Spectrum, AFS** (same as **Site Frequency Spectrum, SFS**): histogram of the number of segregating variants depending on their frequency in one or more populations.
- **Restriction site-Associated DNA (RAD) sequencing**: family of diverse genotyping methods that sequence short fragments of the genome adjacent to recognition site(s) for specific restriction endonuclease(s).
- **Linkage Disequilibrium (LD)**: in this review, correlation of genotypes at a pair of markers across individuals.
- **LD block**: typical distance between markers in the genome across which their genotypes remain correlated.
- **Genome scan**: profiling of genotypes along the genome looking for unusual patterns. Often used to look for signatures of natural selection or introgression.
- **“Denser-than-LD” genotyping**: genotyping of several polymorphic markers per LD block.
- **Highly contiguous reference**: genome or transcriptome reference sequence containing the least amount of fragmentation.
- **Phased data**: data showing which SNP alleles belong to the same homologous chromosome copy.
- **Cross-tissue gene expression analysis**: looking for individual-specific shifts in gene expression detectable across multiple tissues. Such shifts are predominantly genetic in nature.

---

The focus of this review is mainly on the type of sequencing data required and how to obtain it in the most cost-efficient way rather than on analytical approaches. That said, I could not help but mention some highly promising analytical methods that are not yet broadly adopted by OMO researchers, such as demographic inference based on allele frequency spectra and annotation-independent analyses of gene expression data.

44

45 I will start with the summary of general types of questions in OMO studies and corresponding  
46 data types required. We might be interested in the following four layers of genomic information,  
47 each requiring a specific type of experimental and reference data:

48

49 1. Genome-wide patterns of neutral variation. This data can elucidate population structure,  
50 population sizes, and migration rates, as well as changes of these parameters through time. This  
51 analysis benefits from high quality genotype calls but does not require dense genome coverage; it  
52 can even be performed in the absence of reference genome.

53

54 2. Regions in the genome particularly affected by non-drift processes (natural selection,  
55 introgression, etc). This type of analysis, typically referred to as “genome scanning”, takes  
56 genome-wide neutral variation as baseline and looks for regions in the genome exhibiting highly  
57 dissimilar patterns. It requires “denser-than-LD” genotyping and a highly contiguous reference  
58 (see Glossary) to make sure no signal is overlooked.

59

60 3. Genome-wide gene expression, an extremely information-rich resource reflecting both  
61 environmental and genetic variation. Streamlined transcript counting methods represent a cost-  
62 efficient alternative to the industry-standard RNA-seq for generating quantitative data. Analysis  
63 of gene expression does not require a genome reference, although a transcriptome reference must  
64 be generated at some point. The reference does not have to be highly contiguous.

65

66 4. Epigenetics, here limited to DNA methylation. A variety of methods have been recently  
67 developed that can generate data for DNA methylation analysis. For vertebrates, genome  
68 reference is needed, but for other animals or plants, in which DNA methylation is much less  
69 prevalent and predominantly occurs in exons, transcriptome or exome presents a good cost-  
70 efficient alternative. The reference does not have to be highly contiguous.

71

## 72 **Genome-wide neutral variation**

73

### 74 *Allele Frequency Spectrum analysis*

75

76 Neutral genetic markers are traditionally analyzed using summaries of allele frequency  
77 differences between populations, such as  $F_{ST}$ . The large amount of markers accessible through  
78 next-generation sequencing opened up the possibility to dramatically enhance this approach by  
79 modeling the evolution of the whole allele frequency spectrum (AFS, see Glossary). AFS  
80 represents a rich source of information to fit alternative models with time-resolved population  
81 sizes and migration rates as parameters (Box 1) based on coalescent simulations (*fastsimcoal2*,  
82 [1]), diffusion approximation (*dadi*, [2]), or ordinary differential equations (*moments*, [3]). Model  
83 selection is then based on likelihood ratio tests or Akaike information criterion. The new *moments*  
84 method is particularly promising, as it is substantially faster than its predecessors and includes  
85 built-in bootstrap, demographic model plotting, and capacity to analyze up to five populations  
86 simultaneously. It is also very helpful that *moments* inherits the python code structure well  
87 familiar to *dadi* practitioners.

88

89 *Experimental data*

90

91 The data required for AFS analysis is several thousand biallelic neutral single nucleotide  
92 polymorphisms (SNPs). Ideally, SNPs must not be closely physically linked in the genome to  
93 represent independent data points, although it is fully appropriate to analyze linked SNPs with  
94 AFS methods. The lack of requirement for contiguous SNP coverage makes various flavors of  
95 restriction site-associated DNA (RAD) sequencing (recently reviewed in [4,5], see Glossary) well  
96 suited for this analysis. In our experience, *dadi* [2] and *moments* [3] work robustly with 5-10  
97 thousand SNPs (a typical RAD output) when analyzing populations individually or in pairs.  
98 Fitting models with three (*dadi*) or more (*moments*, *fastsimcoal2*) populations might be  
99 problematic with this relatively low number of SNPs but is usually not required for OMOs (Box  
100 1). Recent population size changes are often of special interest in OMOs; since they  
101 predominantly affect rare alleles, their robust detection requires 20 or more high-quality  
102 genotypes per population [6]. This preference for more individuals rather than more SNPs per  
103 individual is an additional factor that makes cost-efficient RAD the approach of choice for AFS-  
104 based analysis. That said, relatively low number of independent (unlinked) SNPs generated by  
105 some RAD protocols might limit the power of the AFS analysis, and a good subject for a future  
106 study would be the effect of the number of unlinked SNPs on AFS model selection and  
107 uncertainties of parameter estimates. In this regard it is worth noting that RAD flavors differ  
108 considerably in the number of unlinked loci in the genome that they interrogate [4,5].

109

110 For demographic inference, the AFS data must be filtered to exclude potential sites under  
111 selection. Whichever test is used to identify such sites (for example, Bayescan, [7]), for their  
112 removal the false discovery rate should be set as high as 0.5 to ensure purging of the majority of  
113 non-neutral sites. Although under this setting half of the removed sites would be neutral, their  
114 removal will not affect the overall AFS as long as the removed fraction does not comprise more  
115 than 1-2% of the total number of sites.

116

117 *Genotyping quality*

118

119 In diploids, the most common genotyping error is missing one of the alleles in a heterozygote (i.e.,  
120 a false homozygote call); and the next most common error is missing the whole SNP locus  
121 entirely. Both these “missing data” errors are due to insufficient sequencing coverage, the  
122 problem that is pervasive in today’s OMO studies. Such errors strongly affect AFS in the region  
123 of rare alleles, which is unfortunate since rare alleles are the most informative about recent  
124 population history [6,8]. A telltale sign of poor heterozygote calling is under-representation of  
125 singletons, but frequencies of doubletons and higher-order frequency bins are also distorted,  
126 which has strong effect on AFS itself and inferred demographic parameters until mean  
127 sequencing coverage approaches ~10x [9]. When coverage is 10x or higher a good way to filter  
128 data is to select SNPs genotyped in >90-95% of samples [10]; importantly for RAD approach,  
129 this would select SNPs that are unlikely to be affected by null alleles due to mutation in the  
130 restriction endonuclease recognition site [4]. For obvious reasons, for AFS analysis genotype  
131 calls should never be quality-filtered based on allele frequencies (for example, retaining only

132 variants that are detected in a minimum of two individuals or requiring minor allele frequency to  
133 exceed some cutoff). A robust empirical way to evaluate the consistency of genotype calls is to  
134 compare results for independently processed biological samples of the same genotype [11]. Such  
135 genotyping replicates are quite feasible in RAD and are also useful to identify true SNPs for  
136 training variant quality score recalibration model of the GATK pipeline [12]. For low-coverage  
137 data (<10x), a general solution is provided by the *ANGSD* package [13], which generates AFS as  
138 well as other population genetic statistics based on genotype likelihoods without actually calling  
139 genotypes [14]. This method generates unbiased single-population AFS even with 2x coverage  
140 [9]. Still, there is a concern that high variation in coverage across samples and populations might  
141 affect *ANGSD* statistics; to avoid this potential issue it is recommended to discard the lowest-  
142 coverage outliers and down-sample reads from highest-coverage outliers (J. Ross-Ibarra, pers.  
143 comm.).

144

#### 145 *PCR duplicates*

146

147 Presence of PCR duplicates in many early RAD applications has been repeatedly highlighted as a  
148 source of genotyping errors [4,15] due to induced over-dispersion of read counts among alleles  
149 and loci. Interestingly, the proportion of PCR duplicates does not depend on the number of PCR  
150 cycles performed during library preparation. Instead, it depends on the ratio between the number  
151 of reads sequenced ( $N_r$ ) and the number of unique fragments present in the sample prior to PCR  
152 ( $N_o$ ): the fraction of duplicates is the same as expected when sampling  $N_r$  from  $N_o$  with  
153 replacement. Fortunately, PCR duplicates are easy to identify and remove using degenerate tags  
154 ligated to RAD fragments prior to amplification [16]. Most present-day RAD protocols now  
155 implement this simple deduplication procedure, including the current version of 2bRAD [11].

156

#### 157 *Genome reference for AFS analysis*

158

159 A great advantage of RAD-based AFS analysis for OMOs is that SNPs can be called based on  
160 RAD reads themselves, without the need for genome reference. Several *de novo* RAD genotyping  
161 pipelines have been developed, such as STACKS, pyRAD, and UNEAK (see references in [4])  
162 that work for most RAD flavors, plus a similarly structured pipeline for 2bRAD  
163 ([https://github.com/z0on/2bRAD\\_denovo](https://github.com/z0on/2bRAD_denovo)) that takes into account the fact that in 2bRAD either  
164 strand of the locus can be sequenced. Still, using a reference genome to call RAD genotypes  
165 provides three important advantages. First, it identifies physically linked (and thus potentially  
166 non-independent) groups of SNPs, to be resampled as units during AFS bootstrap. The second  
167 advantage is particularly important for OMOs sampled in the field: mapping to reference genome  
168 automatically discards reads from contaminant DNA sources (viruses, bacteria, ingested food,  
169 symbionts etc). To be able to discard such contaminants in *de novo* RAD pipeline the experiment  
170 must include at least one sample generated from a clean source and consider only the RAD loci  
171 observed in that sample.

172

173 The third advantage of reference-based genotyping is the possibility to discriminate between  
174 ancestral and derived SNP alleles, to attain the best power of AFS-based inference. Counter-  
175 intuitively, the best reference for AFS analysis is not a genome of the species under investigation

176 but a genome of a related outgroup species, separated from the focal one by a few million years  
177 of evolution, because the SNP state as in the outgroup can be assumed to represent the ancestral  
178 state (e.g., [17]). If the reads are mapped to the same-species genome, to identify ancestral states  
179 of the variants a single well-sequenced RAD sample of an outgroup taxon could be included. The  
180 analysis will then be limited to sites that can be successfully genotyped both in ingroup and  
181 outgroup; in effect, the result is going to be the same as when mapping the reads from whole  
182 project to an outgroup's genome. Although some proportion of ancestral states will be  
183 misidentified due to incomplete lineage sorting, convergence or technical artifacts, this error is  
184 easy to account for by including a single additional parameter into the model, specifying the  
185 proportion of the AFS that needs to be flipped when predicting the data (e.g., [18]). The reference  
186 for AFS does not have to be highly contiguous; the contigs should be just long enough to cover a  
187 typical LD block for meaningful bootstrapping.

188

### 189 **Genome scanning**

190

191 Since outlier regions by definition occupy only a small portion of the genome and typically do not  
192 form a single cluster, their confident detection requires “denser-than-LD” genotyping (see  
193 Glossary). It has been argued that in most situations, RAD-like approaches would sample the  
194 genome too sparsely to satisfy this requirement [19,20]. Although many successful genome scans  
195 based on RAD have been published [21], RAD cannot be recommended for genome scanning  
196 since it inevitably leaves considerable fraction of the genome unexplored. Even when LD is  
197 known to be extensive enough for RAD to produce “denser-than-LD” genotyping, a better  
198 solution might be to take full advantage of the extended LD and go instead for low coverage  
199 whole-genome sequencing (WGS) followed by imputation, to obtain full-genome phased data  
200 (Table 1).

201

202 The types of sequencing approaches for genome scanning with their pros and cons are  
203 summarized in Table 1. Importantly, all of them require highly accurate reads mapped to a  
204 reference for confident SNP detection, making short Illumina reads the genotyping data type of  
205 choice. Some of the very promising approaches that have not yet been fully adopted for OMOs  
206 are exome-seq and ultra-low whole genome sequencing (WGS) with imputation. Exome-seq used  
207 to be a prerogative of model organisms because of the need for exome-capture platform  
208 development, but it has recently been shown that OMO exome can be captured just as efficiently  
209 using bead-bound normalized cDNA obtained from the OMO itself (EecSeq Puritz 2017). Such  
210 “home-made exome” sequencing could become an excellent alternative to RAD since it would  
211 interrogate essentially all the interpretable genetic variation for a comparably low cost. Ultra-low  
212 WGS with imputation used to require extensive reference haplotype panels available only for  
213 well-established model organisms. However, several methods have been recently developed  
214 (most notably STITCH, [22]) that can impute phased genotypes and correct genotyping errors in  
215 ultra-low coverage data without relying on reference panels. Still, their applicability for each new  
216 OMO must be experimentally confirmed because the success of imputation critically depends on  
217 multiple polymorphisms occurring within a typical LD block, and whether this is so is not known  
218 for OMOs *a priori*. Demographic events such as strong recent bottleneck, domestication, or  
219 recent colonization would make imputation more efficient because of more extensive LD and

220 small number of founding haplotypes [22], and conversely, in large outbred populations  
221 imputation will be less accurate and might require sequencing of a very large number (thousands)  
222 of individuals. The accuracy of imputation can be evaluated by sequencing a few individuals at  
223 high coverage (>10x) to generate high-confidence genotype calls and then attempting to impute  
224 them based on sub-sampled read sets to emulate low coverage. It must be noted that it is  
225 inappropriate to measure imputation accuracy by imputing genotype calls masked in high-quality  
226 datasets (as in, for example, [23]): masked data do not contain false homozygote calls and  
227 therefore do not correctly represent the real-life situation.

228

## 229 **Gene expression**

230

231 There are many aspects to gene expression, of which I here focus on just one: abundance  
232 or protein-coding (polyadenylated) transcripts. The reason is that transcript abundance is by far  
233 the most interpretable and it can be very easily analyzed in OMOs.

234

### 235 *Counting transcripts instead of resequencing them*

236

237 Typical RNA-seq [24] resequences the whole transcriptome in each sample, but there is a  
238 much more economic way to count abundances of protein-coding transcripts: sequence just a  
239 single fragment per each transcript molecule and count reads corresponding to each gene. TagSeq  
240 [25], for example, sequences a single randomly generated fragment near the 3'-end of the  
241 transcript, which is the most economic use of sequencing effort and removes bias towards longer  
242 transcripts. In a recent benchmarking study TagSeq was actually more accurate than the standard  
243 RNA-seq in measuring transcript abundances, despite nearly tenfold lower cost [26]. More  
244 recently introduced QuantSeq [27] is conceptually similar to TagSeq: it also sequences a single  
245 randomly generated fragment near the 3'-end of each transcript but has a different library  
246 preparation procedure, implemented as a kit from Lexogen (<https://www.lexogen.com/quantseq-3mrna-sequencing/>). Bioinformatics analysis for both TagSeq and QuantSeq is highly simplified  
247 compared to typical RNA-seq. TagSeq was originally designed for OMOs and so its pipeline uses  
248 transcriptome rather than genome as a reference to attribute reads to genes  
249 (<https://github.com/z0on/tag-based-RNAseq>). One notable feature of the current version of  
250 TagSeq pipeline is that it includes removal of PCR duplicates based on adaptor-derived  
251 degenerate tags [11], similarly to 2bRAD and for the same reason – to avoid PCR-associated  
252 over-dispersion or read counts.

253

### 254 *Analysis of gene expression “beyond gene lists”*

255

256  
257 The unfortunate tradition that OMO research inherits from the biomedical field is putting  
258 too much emphasis on possible functional implications of expression changes of specific genes.  
259 For OMOs, this is bound to remain inconclusive because gene annotations are often absent,  
260 tentative or based predominantly on similarity to human genes, which may or may not serve the  
261 same function in the OMO. Even greater problem is interpretation bias: too often researchers  
262 focus primarily on genes that “make sense” and ignore the rest. This leads to conclusions



263 reflecting predominantly the researchers' idea of what *should* be going on rather than what is  
264 actually happening.

265

266 Table 2 lists alternative ways of objective analysis of gene expression data that are  
267 enabled by the large sample sizes feasible with TagSeq or QuantSeq. They either do not require  
268 gene annotations or rely sufficiently general functional summaries to be robust to occasional  
269 missing or mis-annotations. Particularly useful for OMOs are analyses that use gene expression  
270 patterns as anonymous multivariate readouts to compare and classify samples, such as principal  
271 coordinate analysis (PCoA) or differential analysis of principal components (DAPC). Related  
272 multivariate analyses to visualize and classify genome-wide gene expression data, recently  
273 reviewed in [28], have become the mainstream tool of single-cell RNA-seq, where they are used  
274 to discover cell types and quantify differences between them. With appropriate experimental  
275 design, in OMOs these analyses can lead to much more definitive biological conclusions than  
276 studies scrutinizing long lists of differentially expressed genes passing a certain significance  
277 cutoff.

278

279 *Gene expression as functional summary of genotype*

280

281 Gene expression is best known for its context-dependence reflecting phenotypic plasticity, which  
282 is the view inherited from biomedical research dealing with genetically uniform models. In  
283 natural populations, one of the most important sources of gene expression variation is genetic  
284 difference among individuals, manifested as context-*independent*, individual-specific deviations  
285 in gene expression. This is easy to demonstrate in clonally replicated organisms such as corals. In  
286 two reciprocal transplantation experiments performed on different coral species in different  
287 oceans, stable between-genotype differences accounted for more than 50% of total gene  
288 expression variation despite transplantation of clonal fragments for up to a year to highly  
289 dissimilar sites [29,30]. In non-clonal model organisms such as mice or humans, the best  
290 demonstration of the effect of genetic variation on gene expression are abundant differences in  
291 expression between alleles of the same gene [31,32]. In humans, fixed between-population  
292 differences are exemplified by hundreds of genes that are differentially expressed between  
293 African and European Americans [33]. All this suggests that gene expression can be a proxy of  
294 not only phenotypic plasticity and acclimatization, but of genetic variation and adaptation. A  
295 major advantage of the use of gene expression for these types of studies is that gene expression  
296 integrates over many functionally relevant variants in the genome and thus represents a  
297 condensed functional summary of the genotype [34].

298

299 In humans, nearly half of all genetic variants affecting gene expression have detectable effects in  
300 all tissues [32], and so one feasible way to separate genotype-specific gene expression from  
301 context-dependent variation might be to perform “cross-tissue” comparison (see Glossary) to  
302 isolate body-wide expression shifts [35]. In the coming years, cross-tissue or similar analysis is  
303 likely to become a major approach to study functional genetic variation in natural populations.

304

305

## 306 **Epigenetics**

307

308 Among many covalent chromatin modifications I will discuss DNA methylation since it currently  
309 receives the most attention in OMOs. Still it must be mentioned that in plants histone  
310 methylation appears to be no less and perhaps even more involved in acclimatization and  
311 transgenerational plasticity [36]. While vertebrates show high methylation throughout the genome,  
312 invertebrates and plants methylate their genomes sparsely and mostly in protein-coding regions  
313 (so-called gene body methylation, GBM, [37]). The function of this ubiquitous and evolutionarily  
314 ancient DNA modification remains unclear [38,39] and the greatest challenge in the next few  
315 years will be to decipher it. The most important questions are: (i) Does GBM affect gene  
316 expression? (ii) Can it be modified on ecological timescale, to achieve acclimatization to a novel  
317 environment? (iii) Can acquired changes in GBM be transmitted across generations? If the  
318 answers to all three questions are “yes”, then we have a mechanism for transgenerational  
319 inheritance of acquired traits, which is an exciting (albeit tentative, [40]) possibility. Table 3  
320 summarizes the methods for generating DNA methylation data. If every gene in the genome has  
321 to be interrogated, MBD-seq and meDIP provide the best resolution for sequencing effort [38]. If  
322 the goal of the study is to characterize general methylation patterns rather than identify specific  
323 genes, highly cost-efficient solutions are provided by RRBS-seq and methylRAD. For studies  
324 requiring single base resolution, the best approach appears to be direct detection by PacBio or  
325 ONT – however, these exciting developments still require validation in complex genomes.

326

## 327 **Generating a reference sequence**

328

329 For all approaches described here, the accuracy of the reference sequence in terms of per-base  
330 error rate must only be high enough to allow unambiguous mapping of high-accuracy (Illumina)  
331 reads. The gold standard of genome sequence quality, Q30 or 99.9% accuracy, would not provide  
332 any benefit compared to a rough draft accuracy of 99%. Occasional errors in the reference would  
333 manifest themselves as SNPs that are not polymorphic in the analyzed samples and therefore  
334 irrelevant for analysis. This is the same reason why it is possible to use a genome of a related  
335 species as a reference.

336

337 For AFS analysis, which does not require highly contiguous reference, even a rough genome draft  
338 that can be assembled from a single lane worth of 150b paired-end reads from Illumina HiSeq  
339 would be suitable. However, substantially better options are now becoming available for a  
340 comparably low price tag. The technology offered by 10x Genomics [41] attaches specific  
341 barcodes to short reads originating from the same long DNA fragment, which allows assembling  
342 Illumina HiSeq data into very long haplotypes. The two single-molecule long-read “third-  
343 generation sequencing” methods, Single Molecule Real Time (SMRT) sequencing by PacBio and  
344 nanopore sequencing by ONT, produce reads with broad length distribution, including  
345 exceedingly long ones (tens to hundreds of kilobases) resulting in a qualitatively more contiguous  
346 genome assemblies [42–45] (Table 4, see [43] for recent benchmarking study of assembly  
347 pipelines). At the moment of this writing, read accuracy and cost of data for PacBio (Sequel  
348 system) and ONT (R9 flow cell) were equivalent; PacBio generated higher proportion of long  
349 reads than ONT; however, PacBio’s library prep required ten fold more high-quality DNA than



350 ONT. Both for PacBio and ONT it is critically important to obtain high molecular weight DNA in  
351 fragments exceeding 20kb in length. For new OMOs, it is also essential to confirm that the DNA  
352 is accessible to enzymatic modifications by trying to digest it with a frequent-cutting restriction  
353 endonuclease.

354

355 For genome scanning, gene expression, or invertebrate DNA methylation analyses targeting  
356 protein-coding sequences (exome) genome sequence might not be the best reference; instead, a  
357 highly contiguous transcriptome assembly would be preferable. Until now the standard way to  
358 generate a *de novo* transcriptome was to perform high-coverage RNA-seq and assemble the  
359 results with Trinity [46]. In the coming years, it is expected that even higher-quality and lower-  
360 cost OMO transcriptomes would be generated by PacBio or ONT sequencing of full-length  
361 cDNA (or, for ONT, direct mRNA sequencing). The long-read capacity of these technologies  
362 would essentially obviate the need for assembly, leaving only the sequence correction procedure  
363 to be performed.

364

365 Finally, which tissue or body part to sample for sequencing? For genome sequencing it does not  
366 matter much as long as contamination by other DNA sources can be kept to a minimum, but for  
367 *de novo* transcriptomics it is not a trivial question, as gene expression varies dramatically across  
368 tissues and life cycle stages. In mammals, there is definitely an organ of choice that expresses  
369 nearly all genes in the genome: testis. Rather unexpected transcriptome complexity in the testis is  
370 putatively due to chromatin re-packaging during spermatogenesis, which results in genome-wide  
371 transcription leakage [47]. If so, testis might be a good choice for *de novo* transcriptomics not  
372 only for mammals but for any organism that produces compact sperm.

373

#### 374 **Note on data sharing**

375

376 As we have seen, the best power of ecological genomics in OMOs is achieved using a genome or  
377 transcriptome reference. Every new reference dataset enables new biological questions, and the  
378 whole OMO field will get a great boost if these resources are promptly shared. Please consider  
379 rapidly sharing your reference data, at least as soon as the initial preprint of your paper is posted  
380 to bioRxiv and ideally sooner, by distributing the link to data through research-related email list  
381 or professional twitter feed.

382

#### 383 **References**

- 384 1 Excoffier, L. *et al.* (2013) Robust demographic inference from genomic and SNP data.  
385 *PLoS Genet.* 9, e1003905
- 386 2 Gutenkunst, R.N. *et al.* (2009) Inferring the joint demographic history of multiple  
387 populations from multidimensional SNP frequency data. *PLoS Genet.* 5, e1000695
- 388 3 Jouganous, J. *et al.* (2017) Inferring the Joint Demographic History of Multiple  
389 Populations: Beyond the Diffusion Approximation. *Genetics* DOI:  
390 10.1534/genetics.117.200493
- 391 4 Andrews, K.R. *et al.* (2016) Harnessing the power of RADseq for ecological and  
392 evolutionary genomics. *Nat. Rev. Genet.* 17, 81–92
- 393 5 Puritz, J.B. *et al.* (2014) Demystifying the RAD fad. *Mol. Ecol.* 23, 5937–5942
- 394 6 Robinson, J.D. *et al.* (2014) Sampling strategies for frequency spectrum-based population  
395 genomic inference. *Bmc Evol. Biol.* 14, 254

- 396 7 Günther, T. and Coop, G. (2013) Robust identification of local adaptation from allele  
397 frequencies. *Genetics* 195, 205–20
- 398 8 Schiffels, S. *et al.* (2016) Iron Age and Anglo-Saxon genomes from East England reveal  
399 British migration history. *Nat. Commun.* 7, 1–9
- 400 9 Han, E. *et al.* (2014) Characterizing bias in population genetic inferences from low-  
401 coverage sequencing data. *Mol. Biol. Evol.* 31, 723–35
- 402 10 Matz, M. V *et al.* (2017) Potential for rapid genetic adaptation to warming in a Great  
403 Barrier Reef coral. *bioRxiv* at <<http://www.biorxiv.org/content/early/2017/06/18/114173>>
- 404 11 Dixon, G.B. *et al.* (2015) Genomic determinants of coral heat tolerance across latitudes.  
405 *Science (80-. )*. 348, 1460–1462
- 406 12 Mckenna, A. *et al.* (2010) The Genome Analysis Toolkit: A MapReduce framework for  
407 analyzing next-generation DNA sequencing data. *Genome Res.* 20, 1297–1303
- 408 13 Korneliussen, T. *et al.* (2014) ANGSD: Analysis of Next Generation Sequencing Data.  
409 *BMC Bioinformatics* 15, 356
- 410 14 Nielsen, R. *et al.* (2012) SNP calling, genotype calling, and sample allele frequency  
411 estimation from new-generation sequencing data. *PLoS One* 7, e37558
- 412 15 Andrews, K.R. and Luikart, G. (2014) Recent novel approaches for population genomics  
413 data analysis. *Mol. Ecol.* 23, 1661–1667
- 414 16 Casbon, J.A. *et al.* (2011) A method for counting PCR template molecules with  
415 application to next-generation sequencing. *Nucleic Acids Res.* 39, e81
- 416 17 Gojobori, J. *et al.* (2007) Adaptive evolution in humans revealed by the negative  
417 correlation between the polymorphism and fixation phases of evolution. *Proc. Natl. Acad.*  
418 *Sci. U. S. A.* 104, 3907–12
- 419 18 Tine, M. *et al.* (2014) European sea bass genome and its variation provide insights into  
420 adaptation to euryhalinity and speciation. *Nat. Commun.* 5, 5770
- 421 19 Lowry, D.B. *et al.* (2017) Breaking RAD: An evaluation of the utility of restriction site  
422 associated DNA sequencing for genome scans of adaptation. *Mol. Ecol. Resour.* 17, 142–  
423 152
- 424 20 Tiffin, P. and Ross-Ibarra, J. (2014) Advances and limits of using population genetics to  
425 understand local adaptation. *Trends Ecol. Evol.* 29, 673–680
- 426 21 McKinney, G.J. *et al.* (2017) RADseq provides unprecedented insights into molecular  
427 ecology and evolutionary genetics: comment on Breaking RAD by Lowry *et al.* (2016).  
428 *Mol. Ecol. Resour.* 17, 356–361
- 429 22 Davies, R.W. *et al.* (2016) Rapid genotype imputation from sequence without reference  
430 panels. *Nat. Genet.* 48, 965–969
- 431 23 Money, D. *et al.* (2015) LinkImpute: Fast and Accurate Genotype Imputation for  
432 Nonmodel Organisms. *G3 Genes, Genomes, Genet.* 5, 2383–2390
- 433 24 Morin, R.D. *et al.* (2008) Profiling the HeLa S3 transcriptome using randomly primed  
434 cDNA and massively parallel short-read sequencing. *Biotechniques* 45, 81–94
- 435 25 Meyer, E. *et al.* (2011) Profiling gene expression responses of coral larvae (*Acropora*  
436 *millepora*) to elevated temperature and settlement inducers using a novel RNA-Seq  
437 procedure. *Mol. Ecol.* 20, 3599–3616
- 438 26 Lohman, B.K. *et al.* (2016) Evaluation of TagSeq, a reliable low-cost alternative for  
439 RNAseq. *Mol. Ecol. Resour.* 16, 1315–1321
- 440 27 Moll, P. *et al.* (2014) QuantSeq 3' mRNA sequencing for RNA quantification. *Nat.*  
441 *Methods* 11, 25
- 442 28 Rostom, R. *et al.* (2017) Computational approaches for interpreting scRNA-seq data.  
443 *FEBS Lett.* DOI: 10.1002/1873-3468.12684
- 444 29 Kenkel, C.D. and Matz, M. V (2016) Gene expression plasticity as a mechanism of coral  
445 adaptation to a variable environment. *Nat. Ecol. Evol.* 1, 14
- 446 30 Dixon, G.B. *et al.* (2014) Bimodal signatures of germline methylation are linked with gene

- 447 expression plasticity in the coral *Acropora millepora*. *BMC Genomics* 15, 1109
- 448 31 Crowley, J.J. *et al.* (2015) Analyses of allele-specific gene expression in highly divergent  
449 mouse crosses identifies pervasive allelic imbalance. *Nat. Genet.* 47, 353–60
- 450 32 The GTEx Consortium (2015) The Genotype-Tissue Expression (GTEx) pilot analysis:  
451 Multitissue gene regulation in humans. *Science (80-. )*. 348, 648–660
- 452 33 Melé, M. *et al.* (2015) The human transcriptome across tissues and individuals. *Science*  
453 (80-. ). 348, 660–665
- 454 34 Gamazon, E.R. *et al.* (2015) A gene-based association method for mapping traits using  
455 reference transcriptome data. *Nat. Genet.* 47, 1091–1098
- 456 35 Wheeler, H.E. *et al.* (2016) Survey of the Heritability and Sparse Architecture of Gene  
457 Expression Traits across Human Tissues. *PLOS Genet.* 12, e1006423
- 458 36 Lämke, J. and Bäurle, I. (2017) Epigenetic and chromatin-based mechanisms in  
459 environmental stress adaptation and stress memory in plants. *Genome Biol.* 18, 124
- 460 37 Feng, S. *et al.* (2010) Conservation and divergence of methylation patterning in plants and  
461 animals. *Proc. Natl. Acad. Sci. U. S. A.* 107, 8689–94
- 462 38 Dixon, G.B. *et al.* (2016) Evolutionary Consequences of DNA Methylation in a Basal  
463 Metazoan. *Mol. Biol. Evol.* 33, msw100
- 464 39 Sarda, S. *et al.* (2012) The Evolution of Invertebrate Gene Body Methylation. *Mol Biol*  
465 *Evol* 29, 1907–1916
- 466 40 Uller, T. *et al.* (2013) Weak evidence for anticipatory parental effects in plants and  
467 animals. *J. Evol. Biol.* 26, 2161–2170
- 468 41 Kitzman, J.O. (2016) Haplotypes drop by drop. *Nat. Biotechnol.* 34, 296–298
- 469 42 Gordon, D. *et al.* (2016) Long-read sequence assembly of the gorilla genome. *Science (80-*  
470 *.)*. 352, aae0344
- 471 43 Michael, T.P. *et al.* (2017) High contiguity *Arabidopsis thaliana* genome assembly with a  
472 single nanopore flow cell. *bioRxiv* at  
473 <<http://www.biorxiv.org/content/early/2017/06/14/149997>>
- 474 44 Jansen, H.J. *et al.* (2017) Rapid de novo assembly of the European eel genome from  
475 nanopore sequencing reads. *bioRxiv* at  
476 <<http://www.biorxiv.org/content/early/2017/01/20/101907>>
- 477 45 Berlin, K. *et al.* (2015) Assembling large genomes with single-molecule sequencing and  
478 locality-sensitive hashing. *Nat. Biotechnol.* 33, 623–630
- 479 46 Haas, B.J. *et al.* (2013) De novo transcript sequence reconstruction from RNA-seq using  
480 the Trinity platform for reference generation and analysis. *Nat Protoc* 8, 1494–1512
- 481 47 Soumillon, M. *et al.* (2013) Cellular Source and Mechanisms of High Transcriptome  
482 Complexity in the Mammalian Testis. *Cell Rep.* 3, 2179–2190
- 483 48 Cosart, T. *et al.* (2011) Exome-wide DNA capture and next generation sequencing in  
484 domestic and wild species. *BMC Genomics* 12, 347
- 485 49 Bundock, P.C. *et al.* (2012) Enrichment of genomic DNA for polymorphism detection in a  
486 non-model highly polyploid crop plant. *Plant Biotechnol. J.* 10, 657–667
- 487 50 De Wit, P. *et al.* (2015) SNP genotyping and population genomics from expressed  
488 sequences - current advances and future possibilities. *Mol. Ecol.* 24, 2310–2323
- 489 51 Bay, R.A. and Palumbi, S.R. (2014) Multilocus adaptation associated with heat resistance  
490 in reef-building corals. *Curr. Biol.* 24, 2952–6
- 491 52 Futschik, A. and Schlötterer, C. (2010) The Next Generation of Molecular Markers From  
492 Massively Parallel Sequencing of Pooled DNA Samples. *Genetics* 186, 207–218
- 493 53 Kofler, R. *et al.* (2011) PoPoolation2: identifying differentiation between populations  
494 using sequencing of pooled DNA samples (Pool-Seq). *Bioinformatics* 27, 3435–3436
- 495 54 Therikildsen, N.O. and Palumbi, S.R. (2017) Practical low-coverage genomewide  
496 sequencing of hundreds of individually barcoded samples for population and evolutionary  
497 genomics in nonmodel species. *Mol. Ecol. Resour.* 17, 194–208

- 498 55 Paradis, E. *et al.* (2004) APE: Analyses of phylogenetics and evolution in R language.  
499 *Bioinformatics* 20, 289–290
- 500 56 Oksanen, J. *et al.* vegan: Community Ecology Package. , *R package ver. 2.4–3.* (2017)
- 501 57 Wright, R.M. *et al.* (2015) Gene expression associated with white syndromes in a reef  
502 building coral, *Acropora hyacinthus*. *BMC Genomics* 16, 371
- 503 58 Strader, M.E. *et al.* (2016) Red fluorescence in coral larvae is associated with a diapause-  
504 like state. *Mol. Ecol.* 25, 559–569
- 505 59 Jombart, T. (2008) adegenet: a R package for the multivariate analysis of genetic markers.  
506 *Bioinformatics* 24, 1403–5
- 507 60 Langfelder, P. and Horvath, S. (2008) WGCNA: an R package for weighted correlation  
508 network analysis. *BMC Bioinformatics* 9, 559
- 509 61 Bay, R.A. and Palumbi, S.R. (2017) Transcriptome predictors of coral survival and growth  
510 in a highly variable environment. *Ecol. Evol.* 7, 4794–4803
- 511 62 Rose, N.H. *et al.* (2016) Gene Networks in the Wild: Identifying Transcriptional Modules  
512 that Mediate Coral Resistance to Experimental Heat Stress. *Genome Biol. Evol.* 8, 243–  
513 252
- 514 63 Lister, R. *et al.* (2009) Human DNA methylomes at base resolution show widespread  
515 epigenomic differences. *Nature* 462, 315–22
- 516 64 Meissner, A. *et al.* (2008) Genome-scale DNA methylation maps of pluripotent and  
517 differentiated cells. *Nature* 454, 766–770
- 518 65 Serre, D. *et al.* (2010) MBD-isolated Genome Sequencing provides a high-throughput and  
519 comprehensive survey of DNA methylation in the human genome. *Nucleic Acids Res.* 38,  
520 391–9
- 521 66 Jacinto, F. V. *et al.* Methyl-DNA immunoprecipitation (MeDIP): Hunting down the DNA  
522 methylome. , *BioTechniques*, 44. (2008) , 35–43
- 523 67 Wang, S. *et al.* (2015) MethylRAD: a simple and scalable method for genome-wide DNA  
524 methylation profiling using methylation-dependent restriction enzymes. *Open Biol.* 5,  
525 150130
- 526 68 Flusberg, B.A. *et al.* (2010) Direct detection of DNA methylation during single-molecule,  
527 real-time sequencing. *Nat. Methods* 7, 461–5
- 528 69 Feng, Z. *et al.* (2013) Detecting DNA Modifications from SMRT Sequencing Data by  
529 Modeling Sequence Context Dependence of Polymerase Kinetic. *PLoS Comput. Biol.* 9,  
530 e1002935
- 531 70 Stoiber, M.H. *et al.* (2017) De novo Identification of DNA Modifications Enabled by  
532 Genome-Guided Nanopore Signal Processing. *bioRxiv* at  
533 <<http://www.biorxiv.org/content/early/2017/04/10/094672>>
- 534 71 Koren, S. *et al.* (2017) Canu: scalable and accurate long-read assembly via adaptive k-mer  
535 weighting and repeat separation. *Genome Res.* 27, 722–736
- 536 72 Chin, C.-S. *et al.* (2016) Phased diploid genome assembly with single-molecule real-time  
537 sequencing. *Nat. Methods* 13, 1050–1054
- 538 73 Li, H. (2016) Minimap and miniasm: Fast mapping and de novo assembly for noisy long  
539 sequences. *Bioinformatics* 32, 2103–2110
- 540 74 Vaser, R. *et al.* (2017) Fast and accurate de novo genome assembly from long uncorrected  
541 reads. *Genome Res.* 27, 737–746
- 542 75 Walker, B.J. *et al.* (2014) Pilon: An integrated tool for comprehensive microbial variant  
543 detection and genome assembly improvement. *PLoS One* 9, e112963
- 544  
545

**Box 1: AFS models.**

In the world of OMOs we are usually dealing with samples from many populations, which would be hard or impossible to model simultaneously; moreover, there are usually many populations left unsampled. To infer meaningful demographic parameters in a sparsely sampled system of many populations, a practical solution is to perform two-dimensional AFS analysis of all population pairs [10]. Typical hypotheses and corresponding tests are:

- Are the two populations demographically separate?
  - o compare model with split to model without split, under which the two compared populations are regarded as independent samples from the same population.
- If yes, is there still gene flow between them?
  - o compare split models with and without migration.
- If yes, is the gene flow symmetric or asymmetric?
  - o compare split model with two potentially different migration rates to a split model with a single symmetrical migration rate.
- Was population size stable or went through changes in the past?
  - o compare single-population model involving population size change in the past to a standard neutral model.

Simple command-line scripts for AFS plotting and running basic pairwise models in *moments* can be found here: <https://github.com/z0on/AFS-analysis-with-moments>. To access the full potential of *moments*, however, the user is expected to compose python scripts of their own.



547 **Table 1. Genotyping approaches for genome scanning.**

| Approach                                           | Features                                                                                                    | Pros                                                                                                                    | Cons                                                                                                                                                                                                                     |
|----------------------------------------------------|-------------------------------------------------------------------------------------------------------------|-------------------------------------------------------------------------------------------------------------------------|--------------------------------------------------------------------------------------------------------------------------------------------------------------------------------------------------------------------------|
| Exome-seq<br>[48,49]                               | Isolates and sequences only the protein-coding portion of genome.                                           | Dense coverage of genes guarantees that coding variants and variants linked to cis-regulatory mutations are discovered. | Other (arguably less important) types of variation are not profiled (e.g., distant enhancers).                                                                                                                           |
| RNA-seq<br>[50,51]                                 | Sequences RNA.                                                                                              | Same as exome sequencing.                                                                                               | Genotyping quality of a gene depends on expression level. Allele-specific expression affects accuracy of heterozygote calls.                                                                                             |
| Pool-seq<br>[52,53]                                | Sequences pooled DNA from multiple individuals from each population.                                        | Dense whole-genome coverage with confident determination of allele frequencies in populations.                          | No possibility for individual-based analysis (such as STRUCTURE) or validation based on genotype-phenotype association across individuals. Must be confident in <i>a priori</i> population designations.                 |
| Low-coverage whole-genome sequencing (WGS)<br>[54] | Sequences individual genomes at ~1-4x coverage.                                                             | Dense whole genome coverage at individual level.                                                                        | Per-site genotypes are unreliable because of missing data; must use uncertainty-aware analysis such as <i>ANGSD</i> .                                                                                                    |
| Ultra-low coverage WGS with imputation<br>[22]     | Sequences individual genomes at <2x coverage, imputes missing genotypes and corrects false homozygote calls | Dense whole genome coverage at individual level, phased data enables haplotype-based analysis                           | Rare alleles (minor allele frequency < 0.05) are missed. Requires large sample sizes (depending on LD, hundreds or thousands of individuals). Accuracy of imputation must be experimentally validated for every new OMO. |

548

549



550 **Table 2. Gene expression analyses not relying on accurate gene annotations**

| Analysis                                                                                              | What does it do                                                                                                                                                                                                                            | Software                                                                                                | Applications |
|-------------------------------------------------------------------------------------------------------|--------------------------------------------------------------------------------------------------------------------------------------------------------------------------------------------------------------------------------------------|---------------------------------------------------------------------------------------------------------|--------------|
| Principal coordinate analysis based on Manhattan distances (sum of all log-fold changes across genes) | Characterizes overall transcriptome differences across experimental groups. Measures fraction of variation attributable to each experimental factor.                                                                                       | R: package <i>ape</i> , function <i>pcoa</i> [55]<br>package <i>vegan</i> , function <i>adonis</i> [56] | [57,58]      |
| Differential analysis of principal components (DAPC)                                                  | Quantifies transcriptome differences between samples with respect to specified multivariate axis. Good for quantifying overall gene expression plasticity.                                                                                 | R: package <i>adeget</i> [59]                                                                           | [29]         |
| Weighted gene co-expression network analysis (WGCNA)                                                  | Identifies co-regulated groups of genes, which are linked to experimental factors and traits <i>post hoc</i> . Method of choice for complex experimental designs (>20 samples) with many quantitative traits measured.                     | R: package WGCNA [60]                                                                                   | [29,61,62]   |
| Rank-based functional summaries of KOG (euKaryotic Orthologous Groups) classes                        | Reveals broad functional trends in gene expression. Particularly useful for OMOs since it tolerates sparse and inaccurate annotations. Its main use is for statistical comparison of highly diverse datasets, even from different species. | R: package <i>KOGMWU</i> [11].                                                                          | [11,58]      |

551

552

553 **Table 3. Methods for interrogating DNA methylation**

| Method                                        | Features                                                                                                 | Pros                                                                                              | Cons                                                                                                                                                                                                                       |
|-----------------------------------------------|----------------------------------------------------------------------------------------------------------|---------------------------------------------------------------------------------------------------|----------------------------------------------------------------------------------------------------------------------------------------------------------------------------------------------------------------------------|
| Whole-Genome Bisulfite Sequencing (WGBS) [63] | Sequences complete genome after bisulfite conversion                                                     | Complete characterization of 5me-cytosine methylation at single-base resolution                   | High coverage is required to obtain quantitative data. In non-vertebrate OMOs, much sequencing effort is wasted since most of genome is not methylated.                                                                    |
| RRBS-seq [64]                                 | Bisulfite sequencing of genome fragments adjacent to all (methylated and unmethylated) CCGG sites        | Saves costs dramatically compared to WGBS.                                                        | Only a fraction of all CpG sites is interrogated. Complicated library preparation protocol. Sequencing effort is wasted on non-methylated sites.                                                                           |
| MBD-seq [65], meDIP [66]                      | Pull-down and sequencing of methylated DNA.                                                              | Optimizes sequencing effort by focusing on methylated DNA.                                        | Complicated library preparation protocol. Resolution equals the length of pulled-down fragments (~300-500b). Pull-down procedure is not absolutely efficient, many reads still correspond to un-methylated genome regions. |
| methylRAD [67]                                | Direct sequencing of genomic fragments adjacent only to the methylated CCGG and CCWGG sites.             | Very simple library prep protocol. Highly cost-efficient due to focus on methylated sites only.   | Only a fraction of all CpG sites is interrogated. New method, requires further benchmarking.                                                                                                                               |
| PacBio [68,69]                                | Direct detection of modified DNA bases during normal SMRT sequencing, based on polymerase lags.          | Robust detection of 4-methylcytosine, 8-oxoguanine, and N6-methyladenine. Single-base resolution. | Same as WGBS. 5-methylcytosine, the most common methylation mark in animals, is not reliably detected.                                                                                                                     |
| ONT [70]                                      | Direct detection of modified DNA bases during normal nanopore sequencing, based on conductivity changes. | Detects all marks, including 5-methylcytosine. Single-base resolution.                            | Same as WGBS.                                                                                                                                                                                                              |

554

555

556

557 **Table 4. Assembly pipelines for PacBio and ONT reads**

| Pipeline                          | Required coverage            | Features                                                  | Pros                                                                                             | Cons                                                                                                                          |
|-----------------------------------|------------------------------|-----------------------------------------------------------|--------------------------------------------------------------------------------------------------|-------------------------------------------------------------------------------------------------------------------------------|
| Canu + Quiver* [71]               | >30x                         | Correct and trims reads before assembly.                  | Best accuracy at base, indel and assembly level.                                                 | Very computationally demanding for large genomes. Generates incomplete assemblies at low coverage.                            |
| Falcon + Quiver* [72]             | >50x                         | Similar to Canu.                                          | Standard for PacBio.                                                                             | Very computationally demanding for large genomes. High reliance on reads >20kb. Highly incomplete assemblies at low coverage. |
| minimap + miniasm + racon [73,74] | <30x                         | Raw reads are assembled, correction is done post-assembly | Very fast even for large genomes. Works with lower coverage, shorter reads than Canu and Falcon. | The resulting accuracy is lower than with Canu + Quiver.                                                                      |
| pilon [75]                        | NA (error correction method) | Performs additional correction post-assembly.             | Boosts accuracy for any assembly.                                                                | Requires high-quality Illumina reads.                                                                                         |

558 \*Quiver is a consensus polishing software that is now replaced by Arrow to handle PacBio  
559 Sequel data (<https://github.com/PacificBiosciences/GenomicConsensus>). Racon [74] can be used  
560 instead of Quiver/Arrow [43].  
561
